# Supplementary material
Source: Research Square preprint supplement (doi:10.21203/rs.3.rs-9481796/v1)
Supplement: Supplementary file 1 [file 5d1acab1b81ccab8a3eaef62.pdf]

Supplementary materials for

## Sedimentary evidence of limnic eruptions in Lake Monoun, West Cameroon

Amin Nsangou MOUHAMED<sup>1,2\*</sup>, Dmitri ROUWET<sup>3</sup>, Maarten VAN DAELE<sup>4</sup>, Sabine SCHMIDT<sup>5</sup>, Reza SAFAIERAD<sup>1</sup>, Marttiina RANTALA<sup>1</sup>, Emile EKOMANE<sup>2</sup>, Nathalie FAGEL<sup>1</sup>

<sup>1</sup> AGEs, Department of Geology, Faculty of Sciences, Liège University, Belgium

<sup>2</sup> Department of Earth Sciences, Faculty of Sciences, Yaoundé University, Cameroon

<sup>3</sup> National Institute of Geophysics and Volcanology, Bologna Section, Italy

<sup>4</sup> Department of Geology, Faculty of Sciences, Ghent University, Belgium

<sup>5</sup> EPOC, Bordeaux University, Pessac Cedex, France

\*Corresponding author: [aminnsang7@gmail.com](mailto:aminnsang7@gmail.com) / [aminnsangou.mouhamed@uliege.be](mailto:aminnsangou.mouhamed@uliege.be)

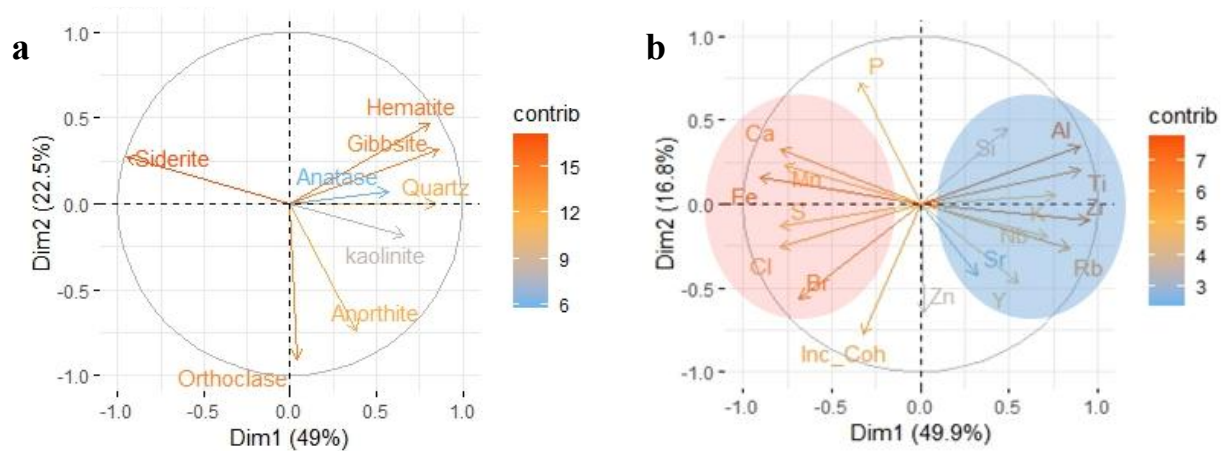

**Figure S1. Principal component analysis (PCA).** **a** PCA of mineralogy with siderite on the negative axis and the others on the positive axis. **b** PCA of geochemical elements with one group of elements on the negative axis (red circle) and another on the positive axis (blue circle).

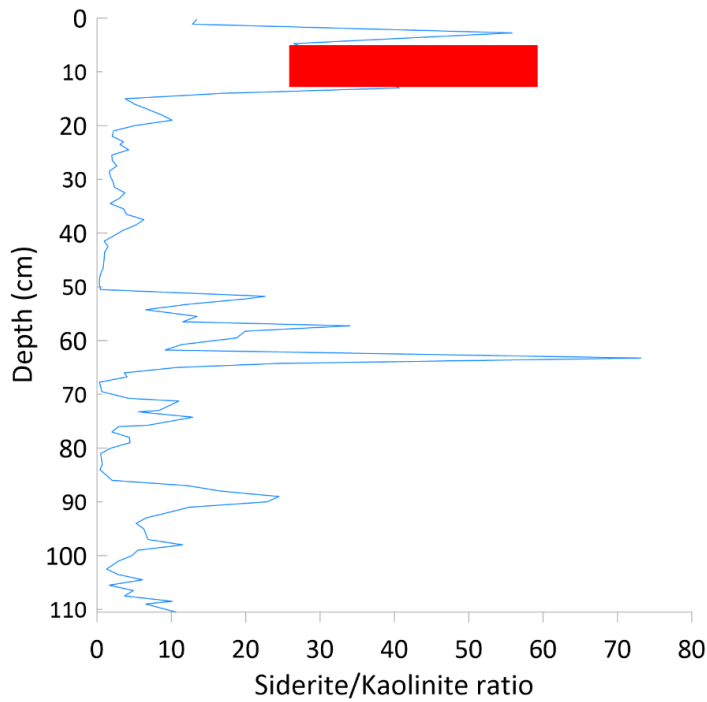

**Figure S2.** Relationship between siderite and kaolinite peaks to support the TOPAS quantification of these two main minerals. The red box highlights the highest siderite content in core LMo23-2.

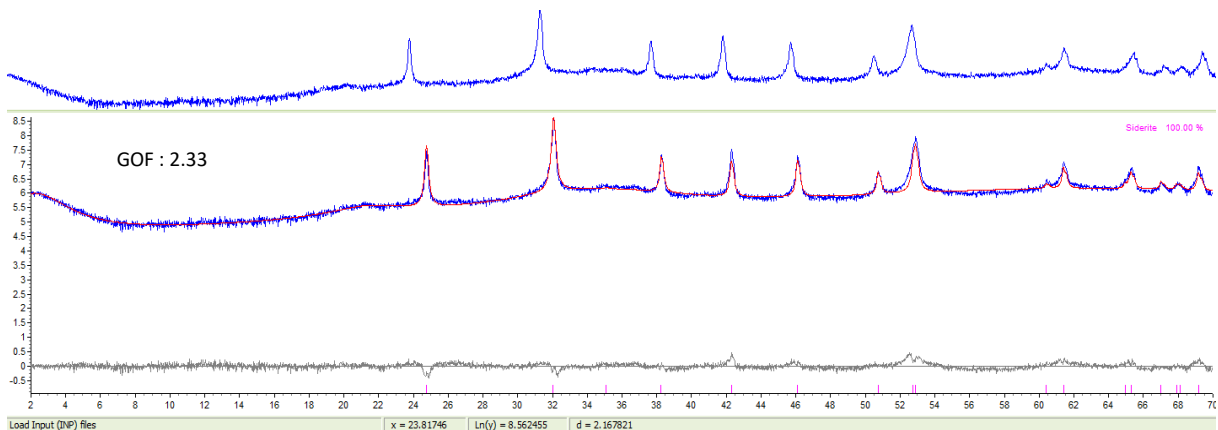

**Figure S3:** Result of the refinement quality of the relative quantification on topaz of the sample containing 100% siderite (10-9cm). The calculated good-of-fitness parameter (GOF) of the reconstructed profile is considered as good 2.33 (value < 3).
